1 **Empirical genomic methods for tracking plasmid spread among healthcare-associated**  
2 **bacteria**

3

4 Running title: Epidemiology of plasmids in hospitals

5

6 Daniel Evans MS<sup>1</sup>, Alexander Sundermann DrPH<sup>2,3</sup>, Marissa Griffith BS<sup>2,3</sup>, Vatsala Srinivasa

7 MPH<sup>2,3</sup>, Mustapha Mustapha MBBS<sup>2,3</sup>, Jieshi Chen MS<sup>4</sup>, Artur Dubrawski PhD<sup>4</sup>, Vaughn

8 Cooper PhD<sup>3,5,6</sup>, Lee Harrison MD<sup>2,3</sup>, Daria Van Tyne PhD<sup>2,3,6</sup>

9

10 <sup>1</sup>Department of Infectious Diseases and Microbiology, University of Pittsburgh Graduate School  
11 of Public Health, Pittsburgh PA, USA

12 <sup>2</sup>Division of Infectious Diseases, University of Pittsburgh School of Medicine, Pittsburgh PA,  
13 USA

14 <sup>3</sup>Center for Genomic Epidemiology, University of Pittsburgh School of Medicine, Pittsburgh PA,  
15 USA

16 <sup>4</sup>Auton Laboratory, Carnegie Mellon University, Pittsburgh PA, USA

17 <sup>5</sup>Department of Microbiology and Molecular Genetics, University of Pittsburgh School of  
18 Medicine, Pittsburgh PA, USA

19 <sup>6</sup>Center for Evolutionary Biology and Medicine, University of Pittsburgh School of Medicine,  
20 Pittsburgh, PA, USA

21

22 Correspondence to Dr. Daria Van Tyne, PhD, Division of Infectious Diseases, University of

23 Pittsburgh School of Medicine, Pittsburgh PA 15213, USA; +1 412 648 4210; vantyne@pitt.edu

24 **Summary**

25 **Background:** Healthcare-associated bacterial pathogens frequently carry plasmids that  
26 contribute to antibiotic resistance and virulence. The horizontal transfer of plasmids in healthcare  
27 settings has been previously documented, but genomic and epidemiologic methods to study this  
28 phenomenon remain underdeveloped. The objectives of this study were to develop a method to  
29 systematically resolve and track plasmids circulating in a single hospital, and to identify  
30 epidemiologic links that indicated likely horizontal plasmid transfer.

31 **Methods:** We derived empirical thresholds of plasmid sequence similarity from comparisons of  
32 plasmids carried by bacterial isolates infecting individual patients over time, or involved in  
33 hospital outbreaks. We then applied those metrics to perform a systematic screen of 3,074  
34 genomes of nosocomial bacterial isolates from a single hospital for the presence of 89 plasmids.  
35 We also collected and reviewed data from electronic health records for evidence of geotemporal  
36 associations between patients infected with bacteria encoding plasmids of interest.

37 **Findings:** Our analyses determined that 95% of analyzed genomes maintained roughly 95% of  
38 their plasmid genetic content at a nucleotide identity at least 99-985%. Applying these similarity  
39 thresholds to identify horizontal plasmid transfer identified 45 plasmids circulating among  
40 clinical isolates. Ten plasmids met criteria for geotemporal links associated with horizontal  
41 transfer. Several plasmids with shared backbones also encoded different additional mobile  
42 genetic element content, and these elements were variably present among the sampled clinical  
43 isolate genomes.

44 **Interpretation:** The horizontal transfer of plasmids among nosocomial bacterial pathogens is  
45 frequent within hospitals and can be monitored with whole genome sequencing and comparative

46 genomics approaches. These approaches should incorporate both nucleotide identity and  
47 reference sequence coverage to study the dynamics of plasmid transfer in the hospital.  
48 **Funding:** This research was supported by the US National Institute of Allergy and Infectious  
49 Disease (NIAID) and the University of Pittsburgh School of Medicine.

## 50 **RESEARCH IN CONTEXT**

### 51 **Evidence before this study:**

52 A search of PubMed for research articles containing the search terms “plasmid”,  
53 “transfer”, “epidemiology”, “hospital”, and “patients” identified 115 peer-reviewed manuscripts  
54 published before 01 January 2022. Twenty-four manuscripts documented the dissemination of  
55 one or more plasmids by horizontal transfer in a hospital setting. Most of these prior studies  
56 focused on a single plasmid, outbreak, antibiotic resistance gene or pathogen species, and none  
57 established an *a priori* approach to identify plasmids circulating among non-clonal bacterial  
58 genomes. While prior studies have quantified plasmid preservation and nucleotide identity,  
59 similarity thresholds to infer horizontal transfer were neither uniform across studies nor  
60 systematically derived from empirical data.

### 61 **Added value of this study:**

62 This study advances the field of genomic epidemiology by proposing and demonstrating  
63 the utility of empirically derived thresholds of plasmid sequence similarity for inferring  
64 horizontal transfer in healthcare settings. It also advances the field by tracking horizontal plasmid  
65 transfer within a single hospital at a hitherto unprecedented scale, examining the evidence of  
66 horizontal transfer of 89 plasmids among thousands of clinical bacterial isolates sampled from a  
67 single medical center. Our systematic review of patient healthcare data related to horizontal  
68 transfer also occurred at a breadth not previously undertaken in hospital epidemiology.

### 69 **Implications of all the available evidence:**

70 When successfully integrated into contemporary methods for surveillance of nosocomial  
71 pathogens, comparative genomics can be used to track and intervene directly against the  
72 dissemination of plasmids that exacerbate virulence and antimicrobial resistance in healthcare-

73 associated bacterial infections. Standardized thresholds of plasmid identity benefit epidemiologic  
74 investigations of horizontal transfer similar to those offered by establishing uniform thresholds of  
75 genome identity for investigations of bacterial transmission.

## 76 **Introduction**

77 Healthcare-associated infections impose a serious burden on healthcare infrastructure and  
78 widespread morbidity and mortality, both in the United States and worldwide.<sup>1</sup> Plasmids carried  
79 by bacterial pathogens that cause these infections often carry genes conferring antimicrobial  
80 resistance, virulence, and environmental persistence. These features complicate patient care and  
81 increase disease severity.<sup>2,3</sup> While our understanding of plasmid transmission via horizontal  
82 transfer among bacteria in healthcare settings has increased in recent years, it remains poorly  
83 understood compared to healthcare-associated transmission of bacteria.<sup>4-6</sup> One substantial gap in  
84 the burgeoning field of plasmid epidemiology is the lack of uniform thresholds of sequence  
85 similarity by which recent horizontal plasmid transfer can be inferred. Without standardized  
86 genomics-based approaches to resolve and characterize plasmids found in healthcare settings,  
87 inferences regarding plasmid transmission remain speculative and error-prone. Developing  
88 metrics to establish plasmid transmission can aid infection prevention personnel in the spread of  
89 multidrug-resistant bacteria in hospitals, helping to intervene directly against the dissemination  
90 of antimicrobial resistance and virulence.<sup>2,5,7</sup>

91 Our study had two objectives. The first was to establish sequence similarity thresholds to  
92 infer horizontal transfer of plasmids among bacteria collected from a single hospital. The second  
93 was to apply these thresholds to a large dataset of whole-genome sequences of nosocomial  
94 bacterial pathogens from a tertiary hospital,<sup>8,9</sup> and to investigate epidemiologic links between  
95 patients infected with genetically unrelated bacteria encoding the same plasmid. The intended  
96 outcome was to demonstrate that these methods augment our knowledge of plasmid dynamics in  
97 healthcare settings at the scale of an entire hospital, further supporting the value of whole-  
98 genome sequencing (WGS) in healthcare epidemiology.<sup>9-11</sup>

99

## 100 **Methods**

### 101 Collection of clinical bacterial isolates and corresponding patient data

102 The study took place at the University of Pittsburgh Medical Center (UPMC)  
103 Presbyterian Hospital and the University of Pittsburgh School of Medicine. All bacterial isolates  
104 analyzed in this study were collected through the Enhanced Detection System for Hospital-  
105 Associated Transmission (EDS-HAT) project, using previously published eligibility criteria for  
106 selection of isolates.<sup>8,9,11</sup> EDS-HAT uses a combination of WGS surveillance of selected  
107 hospital-associated pathogens and machine learning of the electronic health record to identify  
108 otherwise undetected outbreaks and the responsible transmission routes, respectively. Isolates  
109 were identified using TheraDoc software (Version 4.6, Premier, Inc, Charlotte NC). The  
110 University of Pittsburgh Institutional Review Board (IRB) approved the EDS-HAT project and  
111 classified it as being exempt from informed consent because direct contact with human subjects  
112 is not performed. Approval was also granted (STUDY20060252) to use data collected for the  
113 EDS-HAT project to study the horizontal transfer of mobile genetic elements in the hospital.

114

### 115 Short- and long-read whole-genome sequencing, processing, and assembly

116 DNA was extracted from overnight cultures of single bacterial colonies using a Qiagen  
117 DNeasy Blood and Tissue Kit (Qiagen, Germantown MD). Short-read WGS was performed  
118 using the Illumina platform (Illumina, San Diego CA), with libraries constructed with a Nextera  
119 DNA Sample Prep Kit with 150bp paired-end reads and sequenced on the NextSeq platform.  
120 Trim Galore v0.6.1 was used to remove sequencing adaptors, low-quality bases, and poor-quality  
121 reads.<sup>12</sup> Bacterial species were identified from processed Illumina reads by alignment to Kraken  
122 v1.0 and RefSeq databases.<sup>13,14</sup> Genomes of strains sequenced only with Illumina technology

123 were assembled using SPAdes v3.11.<sup>15</sup> The quality of assembled genomes was then verified  
124 using QUAST.<sup>16</sup> Assembled genomes were excluded if they failed to meet the following quality  
125 control parameters: genome-wide read depth of at least 40X, cumulative length of assembled  
126 genome within 20% of the expected length for the assigned genus, fewer than 400 contigs in the  
127 assembled genome, and an N50 value of greater than 50,000bp. Illumina sequencing data for all  
128 isolates is deposited at NCBI with accession numbers listed in **Appendix 1**.

129 Long-read sequencing and base-calling of select isolates were performed using Oxford  
130 Nanopore technology (Oxford Nanopore Technologies, Oxford, United Kingdom). Libraries  
131 were constructed using a rapid multiplex barcoding kit (catalog number SQK-RBK004).  
132 Sequencing was performed using an Oxford Nanopore MinION device with R9.4.1 flow cells.  
133 Base-calling and read processing was performed using Albacore v2.3.3 or Guppy v2.3.1 (Oxford  
134 Nanopore Technologies, Oxford, United Kingdom) using default parameters. Hybrid assembly  
135 was performed for genomes for which both short- and long-read sequencing data were available  
136 and whose short-read only assemblies passed the aforementioned parameters, using Unicycler  
137 v0.4.7 or v0.4.8-beta.<sup>17</sup>

138

### 139 Genome annotation, plasmid assembly, characterization, alignment, and phylogenetic analyses

140 Assembled genomes and hybrid-assembled plasmids were annotated with Prokka v1.13  
141 or v1.14.<sup>18</sup> Multi-locus sequence types (STs) were assigned using *mlst* v2.16.1 with PubMLST  
142 typing schemes.<sup>19,20</sup> Antibiotic resistance genes were identified by BLASTn alignments of  
143 assembled genomes to the ResFinder v4.1 database.<sup>21,22</sup> Plasmid replicons were identified by  
144 BLASTn alignments of assembled genomes to the PlasmidFinder v2.1 database.<sup>23</sup> Other  
145 genomic features were identified from annotations by Prokka<sup>18</sup> and by BLASTn alignments to



146 the VFDB database.<sup>24</sup> Species were defined by grouping isolates with average nucleotide identity  
147 (ANI) of at least 95% to one another and less than 95% ANI to genomes of other species.<sup>25</sup>  
148 Whole-genome phylogenies were constructed from core genome alignments generated by Roary  
149 v5.18.2<sup>26</sup> using RAxML v8.0.26 with 1,000 bootstrap iterations.<sup>27</sup> Plasmid phylogenies were  
150 constructed from core genome alignments of reference plasmids made with *snippy-core* v4.4.5<sup>28</sup>  
151 using RAxML v8.0.26 with 1,000 bootstrap iterations.<sup>27</sup> Annotated plasmids were aligned to one  
152 another using EasyFig v2.2.2.<sup>28</sup> Plasmids were named according to the genus- or species-based  
153 identification code of the isolate from which they were first identified and the contig in the  
154 hybrid assembly corresponding to the closed plasmid sequence, separated by an underscore.

155

#### 156 Sequence similarity analyses to establish metrics of plasmid transmission

157 Plasmids were identified from hybrid-assembled genomes of clonal isolates implicated in  
158 outbreaks within the same hospital.<sup>10,11</sup> Contigs were classified as plasmids if they were  
159 circularized during hybrid assembly,<sup>17</sup> were 2-300kb in length, and possessed at least one  
160 replicon or conjugative plasmid gene identified by PlasmidFinder, Prokka, or RAST.<sup>18,23,30</sup> The  
161 proportion of plasmid gene content preserved in bacterial genomes (“sequence coverage”) was  
162 calculated by searching for plasmid sequences among the contigs of each assembled bacterial  
163 genome using BLASTn,<sup>30</sup> using a nucleotide sequence identity threshold of 95%. Total plasmid  
164 nucleotide sequence identity was quantified based on single nucleotide polymorphisms (SNPs)  
165 identified by *snippy-core* v4.4.5.<sup>28</sup>

166

#### 167 Resolving plasmids circulating among nosocomial bacterial pathogens in a single hospital

168 Eighty-nine closed reference plasmid sequences that met aforementioned sequence  
169 coverage criteria were selected from whole-genome bacterial sequences constructed using  
170 previously published methods (**Appendix 2**).<sup>5,9,11</sup> Plasmids were de-duplicated by aligning and  
171 visualizing closed reference plasmid sequences of similar lengths and distribution among STs  
172 and species using Mauve or EasyFig v2.2.2.<sup>29,31</sup> 3,074 whole-genome sequences from clinical  
173 bacterial isolates were then screened for the presence of 89 plasmids by calculating sequence  
174 coverage by BLASTn-based contig mapping<sup>32</sup> and sequence identity using *snippy-core*,<sup>28</sup> as  
175 described above (**Supplementary Figure 1**). Plasmids were considered potentially involved in  
176 vertical transmission and/or horizontal transfer if they were present at sufficient nucleotide  
177 similarity and sequence coverage in at least two bacterial genomes of the same or different  
178 bacterial species.

179

#### 180 Identification of geotemporal associations where horizontal plasmid transfer may have occurred

181 Geotemporal associations between plasmid-carrying isolates were identified by  
182 systematic review of patient electronic health record (EHR) data, using a previously published  
183 machine learning algorithm based on case-control methodology followed by manual review of  
184 the algorithm's findings.<sup>33</sup> Geotemporal links highlighted by the algorithm were manually  
185 evaluated if (1) they included bacterial isolates of different STs, species, or genera; (2) at least  
186 one patient was infected during, after, or shortly before the date of culture of their plasmid-  
187 carrying isolate while in the location; and (3) at least one other patient later infected by another  
188 isolate with the same plasmid was exposed to the same location within 90 days of the date(s) of  
189 culture of their isolate(s). Admission records for roommates with overlapping stays were  
190 identified as shared exposures regardless of the length of cohabitation. Manual investigations of

191 patient clusters of interest were performed by a board-certified infection preventionist (AJS),  
192 with the investigator blinded to genomic data regarding associated pathogens or plasmids.

193

## 194 **Results**

### 195 Empirical thresholds of plasmid similarity to indicate potential horizontal transfer

196 While the epidemiology of plasmid transfer among hospital-associated bacteria has  
197 previously been described,<sup>4,5,34,35</sup> the field lacks consistent guidelines for determining when  
198 horizontal plasmid transfer among infection-derived bacterial isolates can be inferred. We  
199 hypothesized that a nucleotide sequence similarity-based threshold could be developed by first  
200 quantifying the sequence similarity of plasmids that were carried by bacterial strains known to  
201 have been transmitted among hospital inpatients. We first examined four plasmids carried by  
202 three clusters of carbapenemase-producing *Klebsiella pneumoniae* and vancomycin-resistant  
203 *Enterococcus faecium* that showed strong genomic and epidemiologic evidence of nosocomial  
204 transmission within our hospital.<sup>10,11</sup> We also examined plasmids present in pairs or groups of  
205 clinical isolates of identical species and sequence types that were isolated from the same patients  
206 at different dates during their hospital stays. These plasmids were presumed to be vertically  
207 transmitted during bacterial cell division and long-term carriage within each patient. In total, we  
208 performed 57 comparisons between 25 plasmids in 47 bacterial genomes; 15 of these  
209 comparisons were between same-patient isolates. Elapsed time between dates of culture of  
210 plasmid-linked strains ranged from zero days to 427 days (mean 119.5 days, median 82 days).

211 We next used a previously published BLASTn-based method to calculate the proportion  
212 of each plasmid's sequence that was preserved in linked isolates.<sup>5</sup> We also quantified the number  
213 of single nucleotide polymorphisms (SNPs) among the shared plasmid sequences present in each  
214 group of epidemiologically linked isolates. We refer to these metrics as "plasmid sequence

215 coverage” and “plasmid sequence identity”, respectively (**Figure 1a**). Ninety-five percent of  
216 these comparisons had sequence coverage values of at least 93.7% (**Figure 1b**) and nucleotide  
217 sequence identity of at least 99.985% (i.e. fewer than 15 SNPs per 100kb of plasmid sequence,  
218 or 1 SNP per 6.67kb) (**Figure 1c**). These results provided initial estimates of sequence similarity  
219 thresholds that were then applied for downstream analyses to detect horizontal transfer within the  
220 hospital environment.

221

### 222 Systematic identification of plasmid horizontal transfer from a single hospital

223 To systematically identify potential horizontal transfer of plasmids within our hospital,  
224 we applied our empirical thresholds described above to search for the presence of 89 reference  
225 plasmids in the genomes of 3,074 clinical bacterial isolates collected from 2,086 patients  
226 (**Supplementary Figure 1**) (**Appendix 2**). Twelve of these plasmids were previously described  
227 in a prior study of mobile genetic element diversity in our hospital.<sup>5</sup> We identified and additional  
228 34 plasmids carried by isolates from more than one patient that had sequence coverage  $\geq 95\%$   
229 and sequence identity  $\geq 99.985\%$  compared to the reference plasmid sequence. The 46 shared  
230 plasmids were present in 336 of 3,074 (10.9%) bacterial isolates and in seven of 12 (58.3%)  
231 genera in our genomic dataset (**Table 1**). Bacterial isolates carrying shared plasmids were  
232 collected from 291 of 2,086 (14%) unique patients. Shared plasmids were most abundant among  
233 isolates belonging to *Enterococcus* (19 plasmids in 214 isolates, 85.6% of *Enterococcus* isolates  
234 in the dataset) (**Figure 2a**) and *Klebsiella* (16 plasmids in 77 isolates, 56.6%) (**Figure 2b**). Nine  
235 of the 46 shared plasmids were detected in isolates belonging to different species, and 23 others  
236 were found in isolates of different multi-locus STs within the same species, suggesting horizontal  
237 plasmid transfer (**Appendix 2**). The remaining 15 plasmids were found in isolates belonging to

238 the same species and ST, suggesting they may have been vertically transmitted between patients  
239 along with the bacteria carrying them. Taken together, these results demonstrate the widespread  
240 distribution of numerous plasmids engaged in vertical transmission and horizontal transfer within  
241 a single hospital.

242

#### 243 Geotemporal associations among patients implicated in horizontal plasmid transfer

244 To investigate the epidemiology of horizontal plasmid transfer, we applied a previously  
245 published screening algorithm<sup>33</sup> to systematically review hospital electronic health record (EHR)  
246 data of patients infected with isolates belonging to different STs, species, or genera that shared  
247 plasmids with high nucleotide identity and high sequence coverage. Using this approach, we  
248 identified 18 groups of patients with geotemporal associations who were infected with isolates  
249 encoding eight different plasmids that were likely horizontally transferred (**Table 2, Appendix**  
250 **2**). These associations fell into three major categories, in which previously uninfected patients  
251 were found to be culture-positive for plasmid-carrying pathogens after they were: (1) admitted to  
252 rooms previously occupied by infected patients, (2) admitted to units simultaneously occupied by  
253 at least one infected patient, or (3) admitted to units previously occupied by at least one infected  
254 patient. These findings suggest that plasmids are frequently horizontally transferred among  
255 pathogens infecting hospitalized patients independent from bacterial transmission.

256

#### 257 Nucleotide sequence identity threshold improves identification of horizontally transferred 258 plasmids

259 To investigate whether the methods we developed provided improved resolution over our  
260 previously published sequence coverage-based approach,<sup>5</sup> we reanalyzed ten plasmids that were

261 resolved and investigated in our earlier study. We found that a small ColRNAI plasmid  
262 (pKLP00155\_6, 9.5kb) that was detected in a large number of isolates of multiple species was  
263 most likely two closely related but distinct plasmids that were co-circulating in our hospital  
264 (**Figure 3a**). Pairwise comparisons to the pKLP00155\_6 reference sequence revealed a group of  
265 13 isolates with >95% sequence coverage of the reference plasmid, but whose sequence  
266 identities ranged from 42 to 73 SNPs per 100kb. When the same sequences were compared to  
267 pCB00073\_2, another reference plasmid that had previously been considered the same as  
268 pKLP00155\_6 based on sequence coverage alone,<sup>5</sup> their pairwise sequence identities ranged  
269 from 0 to 11 SNPs per 100kb. Separation of these two plasmids was further validated by  
270 phylogenetic analysis, which clearly delineated the plasmid sequences into two groups (**Figure**  
271 **3b**). When we investigated geotemporal associations between patients infected with bacteria  
272 carrying these two plasmids (**Table 2**), we found that two patients infected by isolates of  
273 different bacterial species carrying pCB00073\_2 were both cultured during overlapping stays on  
274 the same hospital unit (**Figure 3c**). Unit-based horizontal transmission was also observed for 16  
275 of the 24 patients carrying pKLP00155\_6 housed in three different units, with one patient linked  
276 to two of these units (**Figure 3d**).

277 We also observed several cases of plasmid pairs that met the sequence identity threshold  
278 of  $\geq 99.985\%$  identity, but did not meet the  $\geq 95\%$  sequence coverage threshold. Sequence  
279 alignments confirmed that these plasmid pairs each shared a core or “backbone” plasmid  
280 sequence, with the longer plasmid of each pair carrying additional genetic cargo of transposases  
281 and/or IS6, IS26, and IS110-mediated insertion sequences (**Supplementary Figure 2**).

282 Phylogenetic analysis of one of these pairs, pKLP00161\_2 and pKLP00218\_2, did not separate  
283 the plasmids into distinct clades defined by the presence or absence of the additional MGE,  
284 suggesting potential gain or loss of plasmid cargo during co-temporal circulation of the bacterial

285 isolates carrying these plasmids (**Supplementary Figure 3**). We considered isolates with high  
286 sequence identity and high sequence coverage to one or the other of these plasmid pairs as  
287 encoding the same plasmid backbone for the purposes of assessing epidemiologic links between  
288 patients.

289         We next performed extensive reviews of 19 patient care records associated with  
290 pathogens of different STs or species that carried four different plasmid variants with shared  
291 backbones. Ten patients infected with multiple STs of *K. pneumoniae* and one ST of *K. oxytoca*  
292 that all carried the pKLP00218\_2 backbone sequence had potential exposures across four  
293 different hospital units (**Figure 4a**). Nine patients infected with five different STs of *E. faecium*  
294 carrying the pVRE32553\_4 backbone sequence had potential exposures across three different  
295 hospital units (**Figure 4b**). Taken together, these findings demonstrate how empirically derived  
296 plasmid similarity thresholds enable tracking of plasmid circulation and horizontal transfer  
297 among bacteria. Moreover, these data highlight the potential plasticity of plasmid backbones as  
298 they circulate in a hospital.

299

## 300 **DISCUSSION**

301         In this study, we developed uniform thresholds of genetic similarity among plasmids  
302 from which horizontal transfer in a hospital might be inferred. We then applied these thresholds  
303 to a large dataset of whole-genome sequences of nosocomial bacterial isolates collected from  
304 patients at a single medical center. We observed that plasmids potentially engaged in horizontal  
305 transfer were widespread among infected patients, and subsequent reviews of electronic health  
306 record data found numerous geotemporal links that may have provided opportunities for plasmid  
307 transfer between patients. Our findings extend our previous exploration into the genomics of

308 horizontal plasmid transfer within hospital settings,<sup>5</sup> in which we identified likely plasmid  
309 transfer among bacterial pathogens that either co-infected patients or carried those plasmids  
310 during transmission between patients with shared geotemporal risk factors.

311 This study contributes to the field of bacterial genomic epidemiology in several key  
312 ways. While numerous methods have been previously applied to resolve and characterize  
313 plasmids present among environmental and clinical bacterial isolates from hospitals,<sup>4,5</sup> these  
314 prior studies have largely focused on transmission of antibiotic resistance elements<sup>4,36</sup> or  
315 individual plasmids,<sup>34,35</sup> often as part of corollary findings in studies focused on bacterial  
316 transmission.<sup>6</sup> In contrast, here we developed and implemented an empirical genome sequence-  
317 based approach to systematically cluster plasmids from nosocomial isolates *en masse*. This study  
318 also lays the foundation for more detailed investigations into the mechanics of horizontal  
319 plasmid transfer within clinical settings<sup>2,35</sup>. Lastly, our work further supports the utility of  
320 comprehensive whole-genome sequencing of bacterial isolates from the hospital.<sup>4,5,34</sup>

321 Our findings bolster several recent insights on the potential causes and effects of plasmid  
322 sharing among bacteria infecting hospitalized patients. For example, only 45 of the 89 reference  
323 plasmids we studied carried known genes conferring antimicrobial resistance (**Appendix 2**). This  
324 finding is in agreement with recent research suggesting that while plasmids mediate much of the  
325 spread of antimicrobial resistance, antimicrobial resistance itself may not be the primary driver  
326 of horizontal plasmid transfer in clinical settings.<sup>37</sup> This study also underscores the need for a  
327 more thorough characterization of the plasmidome, as the majority of genes on sequenced  
328 plasmids have unknown functions.<sup>38</sup> We also observed widespread sharing of several plasmids  
329 among vancomycin-resistant *Enterococcus* (VRE) isolates, corroborating previous findings on  
330 the impact of the diversity and extent of plasmid dissemination on enterococcal evolution.<sup>39</sup>



331 Even with the increased scope of our genomic and epidemiologic analysis, we postulate  
332 that our findings still underestimate the true extent to which horizontal plasmid transfer occurs  
333 among nosocomial bacterial pathogens. The large number of hybrid-assembled reference  
334 plasmids we used to search for evidence of plasmid sharing were sequenced from only 56  
335 isolates from a single hospital,<sup>8</sup> representing a small subset of the bacteria that infected  
336 hospitalized patients during the two-year period of this study. Within this relatively limited  
337 dataset, we nonetheless identified several plasmids that exhibited evidence of further  
338 recombination and rearrangement while circulating among patients in the hospital. Future studies  
339 should further refine the methods we have developed here through analysis of additional  
340 reference plasmids as well as isolates sampled from environmental sites or patient colonization.  
341 Additionally, computational approaches that resolve plasmids from whole-genome sequence data  
342 through non-reference-based approaches<sup>40,41</sup> could identify additional cases of likely horizontal  
343 plasmid transfer.

344 Our study had several limitations. Our sequence similarity criteria were developed by  
345 analyzing a relatively small number of isolates and reference plasmids from a single hospital,  
346 which may have introduced selection bias when determining numerical thresholds. Additionally,  
347 our dataset of bacterial genomes was subject to selection criteria that limited the sampling of  
348 some clinical isolates based on phenotypic antimicrobial resistance profiles and/or body sites.<sup>9,33</sup>  
349 The reference plasmids we studied were largely drawn from sequencing data of select pathogens  
350 generated in previous projects,<sup>5,9,42</sup> rather than from comprehensive efforts that may have yielded  
351 more representative samples of plasmids within our hospital. To improve the specificity of our  
352 epidemiologic analyses, we limited our scope to geotemporal associations among isolates with  
353 substantial taxonomic distance. Lastly, our criteria for inferring horizontal transfer were based on

354 professional expertise in hospital infection prevention and the dynamics of bacterial transmission  
355 among hospitalized patients, as knowledge of *in vivo* patterns of plasmid transfer in hospitals is  
356 highly limited.<sup>5,35</sup>

357 In summary, our study advances the field of bacterial genomic epidemiology by applying  
358 empirically derived similarity thresholds encompassing both genetic content and nucleotide  
359 identity to study plasmid spread among bacterial pathogens. The application of our methods to a  
360 large genomic dataset from a single hospital resolved horizontal plasmid transfer at an  
361 unprecedented scale and demonstrated the added value of routine whole-genome sequencing of  
362 nosocomial bacterial pathogens in hospital infection prevention.<sup>8,9,35</sup> Applying these refined,  
363 plasmid-focused approaches in healthcare settings could help infection prevention teams better  
364 understand signs and risk factors for the dissemination of drug resistance, allowing them to  
365 improve their approaches to reduce the risk of severe infections among patients.<sup>5,7,35</sup> Future work  
366 in this area should focus on refining similarity thresholds and surveillance methods, further  
367 examining patterns of mutation and genetic plasticity among circulating plasmids, and  
368 implementing these methods in real-time to control the spread of plasmid-borne antimicrobial  
369 resistance and virulence factors that exacerbate nosocomial infections.

370

## 371 **DATA SHARING**

372 Genome sequence data of all bacterial isolates studied here has been deposited in the  
373 Sequence Read Archive (SRA) with accession numbers listed in Appendix 1. Plasmid sequences  
374 included in this study have been deposited in GenBank with accession numbers listed in  
375 Appendix 2.

376

377 **DECLARATION OF INTERESTS**

378 DE received compensation from the Allegheny County Health Department (Pittsburgh,  
379 PA, USA) for services rendered as an infectious disease epidemiologist while performing  
380 research and writing of this manuscript. DE, AS, and MM received compensation from  
381 EpiCenter Genomics LLC (Pittsburgh, PA, USA) for consulting services in genomic  
382 epidemiology. These entities did not provide funding directly towards the production of this  
383 manuscript, nor did they pay these authors for work contributing to its publication.

384

385 **ACKNOWLEDGEMENTS**

386 We thank Jane Marsh, Daniel Snyder, Chinelo Ezeonwuka, and Kady Waggle for  
387 assistance with clinical isolate collection and whole-genome sequencing. We also thank Melissa  
388 Saul for curating electronic health record data for epidemiologic investigations, as well as Alecia  
389 Rokes for assistance in curating and classifying reference plasmid sequences. Lastly, we thank  
390 Kyle Miller for support in algorithm development and implementation.

## 391 REFERENCES

- 392 1 Centers for Disease Control and Prevention (CDC). 2019 National and State Healthcare-  
393 Associated Infections (HAI) Progress Report. 2019. [https://arpsp.cdc.gov/profile/national-](https://arpsp.cdc.gov/profile/national-progress/united-states)  
394 [progress/united-states](https://arpsp.cdc.gov/profile/national-progress/united-states).
- 395 2 Lerminiaux NA, Cameron ADS. Horizontal transfer of antibiotic resistance genes in clinical  
396 environments. *Can J Microbiol* 2019; **65**: 34–44.
- 397 3 San Millan A. Evolution of Plasmid-Mediated Antibiotic Resistance in the Clinical Context.  
398 *Trends Microbiol* 2018; **26**: 978–85.
- 399 4 Peter S, Bosio M, Gross C, *et al*. Tracking of Antibiotic Resistance Transfer and Rapid  
400 Plasmid Evolution in a Hospital Setting by Nanopore Sequencing. *mSphere* 2020; **5**: e00525-  
401 20, [/msphere/5/4/mSphere525-20.atom](https://doi.org/10.1128/mSphere.00525-20).
- 402 5 Evans DR, Griffith MP, Sundermann AJ, *et al*. Systematic detection of horizontal gene  
403 transfer across genera among multidrug-resistant bacteria in a single hospital. *eLife* 2020; **9**.  
404 DOI:10.7554/eLife.53886.
- 405 6 Tofteland S, Naseer U, Lislevand JH, Sundsfjord A, Samuelsen O. A long-term low-frequency  
406 hospital outbreak of KPC-producing *Klebsiella pneumoniae* involving Intergenous plasmid  
407 diffusion and a persisting environmental reservoir. *PloS One* 2013; **8**: e59015.
- 408 7 Salamzade R, Manson AL, Walker BJ, *et al*. Inter-species geographic signatures for tracing  
409 horizontal gene transfer and long-term persistence of carbapenem resistance. *Genome Med*  
410 2022; **14**: 37.
- 411 8 Mustapha MM, Srinivasa VR, Griffith MP, *et al*. Genomic Diversity of Hospital-Acquired  
412 Infections Revealed through Prospective Whole-Genome Sequencing-Based Surveillance.  
413 *mSystems* 2022; **7**: e01384-21.
- 414 9 Sundermann AJ, Chen J, Kumar P, *et al*. Whole-Genome Sequencing Surveillance and  
415 Machine Learning of the Electronic Health Record for Enhanced Healthcare Outbreak  
416 Detection. *Clin Infect Dis* 2021; : ciab946.
- 417 10 Sundermann AJ, Babiker A, Marsh JW, *et al*. Outbreak of Vancomycin-resistant  
418 *Enterococcus faecium* in Interventional Radiology: Detection Through Whole Genome  
419 Sequencing-Based Surveillance. *Clin Infect Dis Off Publ Infect Dis Soc Am* 2019; published  
420 online July 16. DOI:10.1093/cid/ciz666.
- 421 11 Marsh JW, Mustapha MM, Griffith MP, *et al*. Evolution of Outbreak-Causing Carbapenem-  
422 Resistant *Klebsiella pneumoniae* ST258 at a Tertiary Care Hospital over 8 Years. *mBio* 2019;  
423 **10**. DOI:10.1128/mBio.01945-19.
- 424 12 Krueger F, James F, Ewels P, Afyounian E, Schuster-Boeckler B. FelixKrueger/TrimGalore:  
425 v0.6.7 - DOI via Zenodo. 2021; published online July 23. DOI:10.5281/ZENODO.5127899.
- 426 13 Wood DE, Salzberg SL. Kraken: ultrafast metagenomic sequence classification using exact  
427 alignments. *Genome Biol* 2014; **15**: R46.
- 428 14 Pruitt KD, Tatusova T, Maglott DR. NCBI reference sequences (RefSeq): a curated non-  
429 redundant sequence database of genomes, transcripts and proteins. *Nucleic Acids Res*  
430 2007; **35**: D61-65.
- 431 15 Bankevich A, Nurk S, Antipov D, *et al*. SPAdes: a new genome assembly algorithm and its  
432 applications to single-cell sequencing. *J Comput Biol J Comput Mol Cell Biol* 2012; **19**: 455–  
433 77.
- 434 16 Gurevich A, Saveliev V, Vyahhi N, Tesler G. QUAST: quality assessment tool for genome  
435 assemblies. *Bioinforma Oxf Engl* 2013; **29**: 1072–5.
- 436 17 Wick RR, Judd LM, Gorrie CL, Holt KE. Unicycler: Resolving bacterial genome assemblies  
437 from short and long sequencing reads. *PLoS Comput Biol* 2017; **13**: e1005595.
- 438 18 Seemann T. Prokka: rapid prokaryotic genome annotation. *Bioinforma Oxf Engl* 2014; **30**:  
439 2068–9.
- 440 19 Jolley KA, Bray JE, Maiden MCJ. Open-access bacterial population genomics: BIGSdb

- 441 software, the PubMLST.org website and their applications. *Wellcome Open Res* 2018; **3**:  
442 124.
- 443 20 Seemann T. mlst. <https://github.com/tseemann/mlst>.
- 444 21 Bortolaia V, Kaas RS, Ruppe E, *et al.* ResFinder 4.0 for predictions of phenotypes from  
445 genotypes. *J Antimicrob Chemother* 2020; **75**: 3491–500.
- 446 22 Zankari E, Hasman H, Cosentino S, *et al.* Identification of acquired antimicrobial resistance  
447 genes. *J Antimicrob Chemother* 2012; **67**: 2640–4.
- 448 23 Carattoli A, Zankari E, García-Fernández A, *et al.* In silico detection and typing of plasmids  
449 using PlasmidFinder and plasmid multilocus sequence typing. *Antimicrob Agents Chemother*  
450 2014; **58**: 3895–903.
- 451 24 Liu B, Zheng D, Jin Q, Chen L, Yang J. VFDB 2019: a comparative pathogenomic platform  
452 with an interactive web interface. *Nucleic Acids Res* 2019; **47**: D687–92.
- 453 25 Kim M, Oh H-S, Park S-C, Chun J. Towards a taxonomic coherence between average  
454 nucleotide identity and 16S rRNA gene sequence similarity for species demarcation of  
455 prokaryotes. *Int J Syst Evol Microbiol* 2014; **64**: 346–51.
- 456 26 Page AJ, Cummins CA, Hunt M, *et al.* Roary: rapid large-scale prokaryote pan genome  
457 analysis. *Bioinformatics* 2015; **31**: 3691–3.
- 458 27 Stamatakis A. RAxML version 8: a tool for phylogenetic analysis and post-analysis of large  
459 phylogenies. *Bioinforma Oxf Engl* 2014; **30**: 1312–3.
- 460 28 Seemann, Torsten T. Snippy: rapid haploid variant calling and core SNP phylogeny.  
461 Available. 2015. <https://github.com/tseemann/snippy>.
- 462 29 Sullivan MJ, Petty NK, Beatson SA. Easyfig: a genome comparison visualizer. *Bioinforma*  
463 *Oxf Engl* 2011; **27**: 1009–10.
- 464 30 Aziz RK, Bartels D, Best AA, *et al.* The RAST Server: Rapid Annotations using Subsystems  
465 Technology. *BMC Genomics* 2008; **9**: 75.
- 466 31 Darling ACE. Mauve: Multiple Alignment of Conserved Genomic Sequence With  
467 Rearrangements. *Genome Res* 2004; **14**: 1394–403.
- 468 32 Altschul SF, Gish W, Miller W, Myers EW, Lipman DJ. Basic local alignment search tool. *J*  
469 *Mol Biol* 1990; **215**: 403–10.
- 470 33 Sundermann AJ, Miller JK, Marsh JW, *et al.* Automated data mining of the electronic health  
471 record for investigation of healthcare-associated outbreaks. *Infect Control Hosp Epidemiol*  
472 2019; **40**: 314–9.
- 473 34 Prussing C, Snavely EA, Singh N, *et al.* Nanopore MinION Sequencing Reveals Possible  
474 Transfer of blaKPC–2 Plasmid Across Bacterial Species in Two Healthcare Facilities. *Front*  
475 *Microbiol* 2020; **11**: 2007.
- 476 35 R-GNOSIS WP5 Study Group, León-Sampedro R, DelaFuente J, *et al.* Pervasive  
477 transmission of a carbapenem resistance plasmid in the gut microbiota of hospitalized  
478 patients. *Nat Microbiol* 2021; **6**: 606–16.
- 479 36 Cerqueira GC, Earl AM, Ernst CM, *et al.* Multi-institute analysis of carbapenem resistance  
480 reveals remarkable diversity, unexplained mechanisms, and limited clonal outbreaks. *Proc*  
481 *Natl Acad Sci U S A* 2017; **114**: 1135–40.
- 482 37 Lopatkin AJ, Huang S, Smith RP, *et al.* Antibiotics as a selective driver for conjugation  
483 dynamics. *Nat Microbiol* 2016; **1**: 16044.
- 484 38 Acman M, van Dorp L, Santini JM, Balloux F. Large-scale network analysis captures  
485 biological features of bacterial plasmids. *Nat Commun* 2020; **11**: 2452.
- 486 39 Arredondo-Alonso S, Top J, McNally A, *et al.* Plasmids Shaped the Recent Emergence of the  
487 Major Nosocomial Pathogen *Enterococcus faecium*. *mBio* 2020; **11**: e03284-19,  
488 /mbio/11/1/mBio.03284-19.atom.
- 489 40 Laczny CC, Galata V, Plum A, Posch AE, Keller A. Assessing the heterogeneity of in silico  
490 plasmid predictions based on whole-genome-sequenced clinical isolates. *Brief Bioinform*  
491 2019; **20**: 857–65.

- 492 41Robertson J, Nash JHE. MOB-suite: software tools for clustering, reconstruction and typing of  
493 plasmids from draft assemblies. *Microb Genomics* 2018; **4**. DOI:10.1099/mgen.0.000206.  
494 42Babiker A, Evans DR, Griffith MP, *et al*. Clinical and Genomic Epidemiology of Carbapenem-  
495 Nonsusceptible *Citrobacter* spp. at a Tertiary Health Care Center over 2 Decades. *J Clin*  
496 *Microbiol* 2020; **58**: e00275-20.

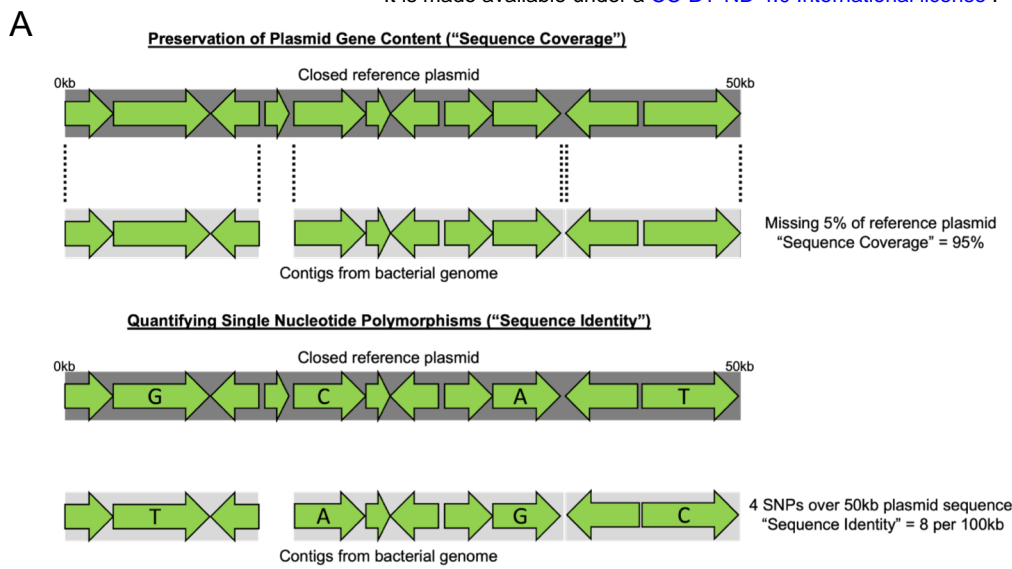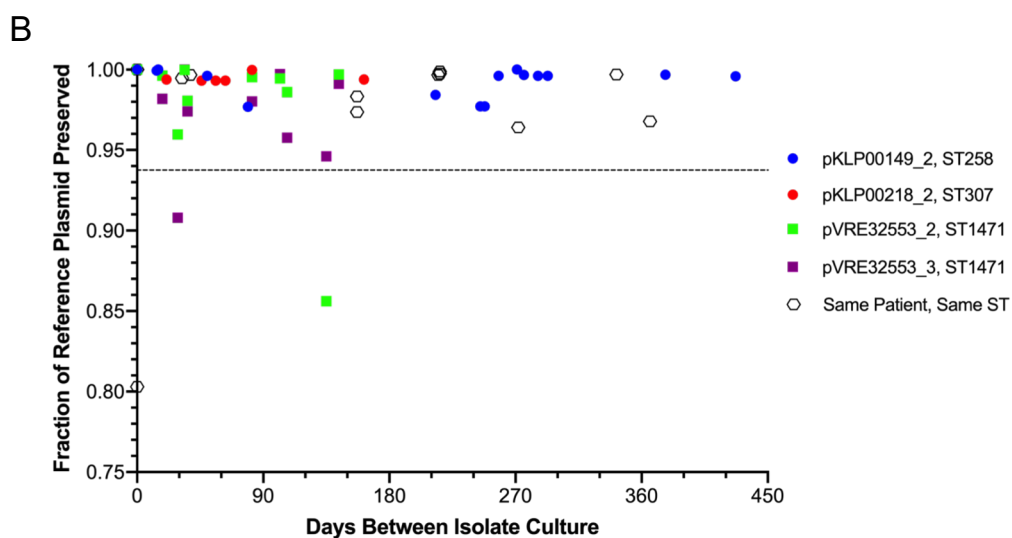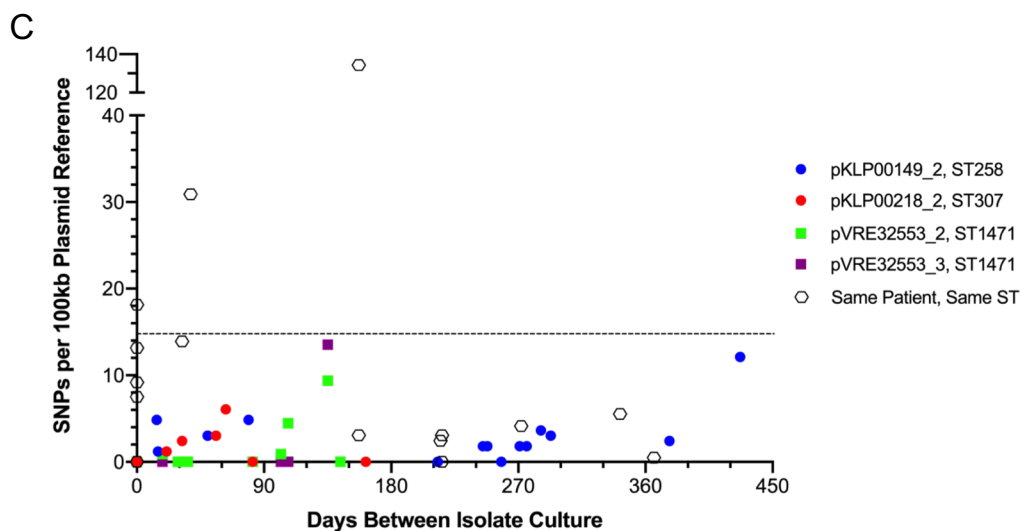

**Figure 1: Empirically derived metrics of plasmid sequence similarity to infer horizontal plasmid transfer**

(A) Approaches used to calculate (top) plasmid sequence coverage and (bottom) plasmid sequence identity. (B) Sequence coverage of plasmids carried by bacteria engaged in transmission between patients or prolonged carriage in the same patient. Dotted line shows the 5th percentile of coverage among analyzed plasmids. (C) Sequence identity of plasmids carried by isolates engaged in transmission between patients or prolonged carriage in the same patient. Dotted line shows the 95th percentile of SNPs per 100kb of plasmid reference sequence.

A

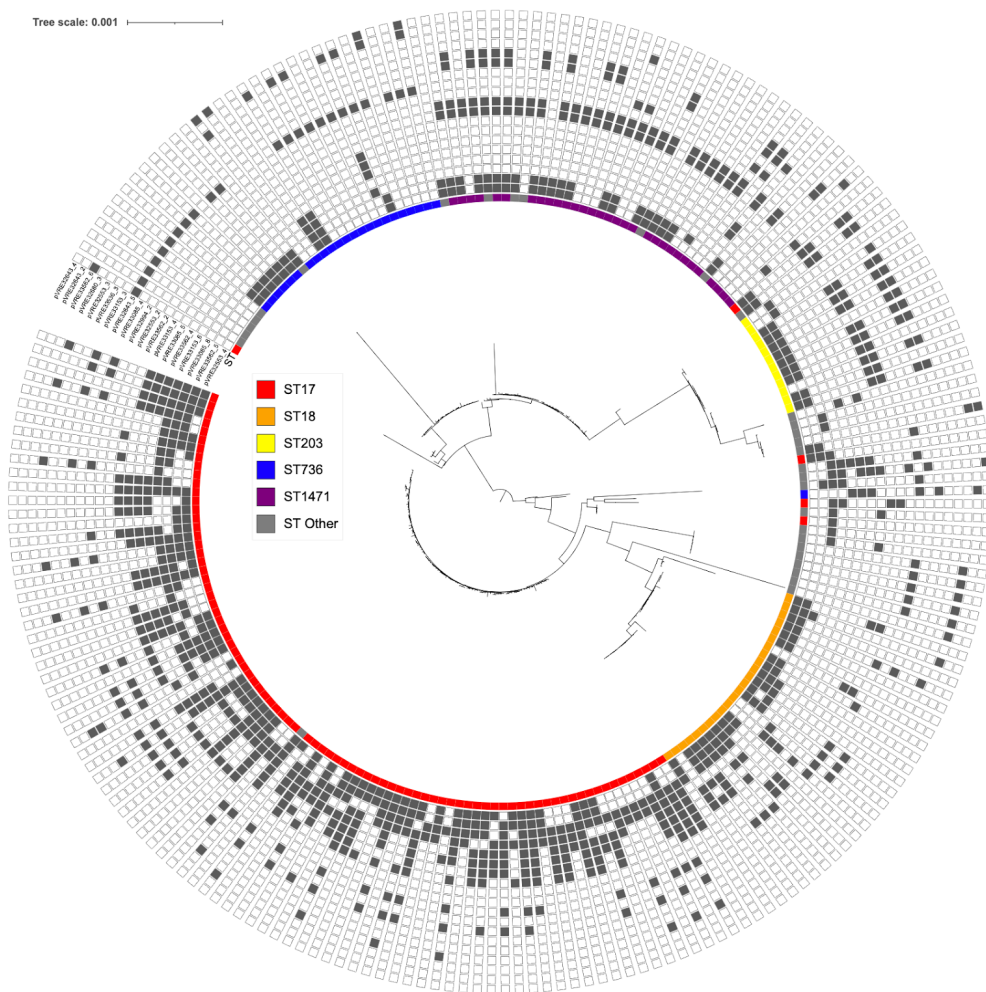

B

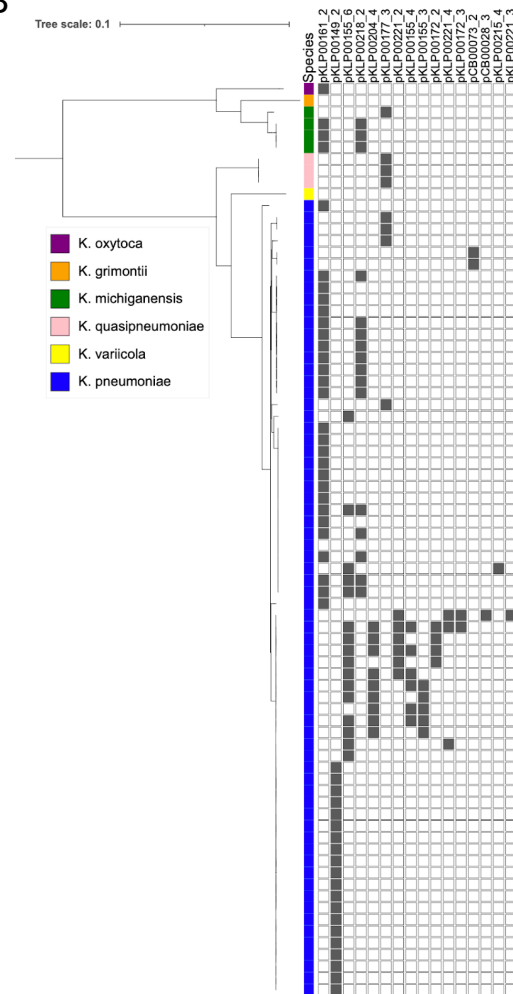

**Figure 2: Plasmid distribution among nosocomial pathogens**

Bootstrapped RAxML phylogenies of (A) vancomycin-resistant *Enterococcus faecium* and (B) *Klebsiella* spp. carrying shared plasmids. Color strips denote (A) sequence type (ST) of *E. faecium* or (B) species of *Klebsiella*.



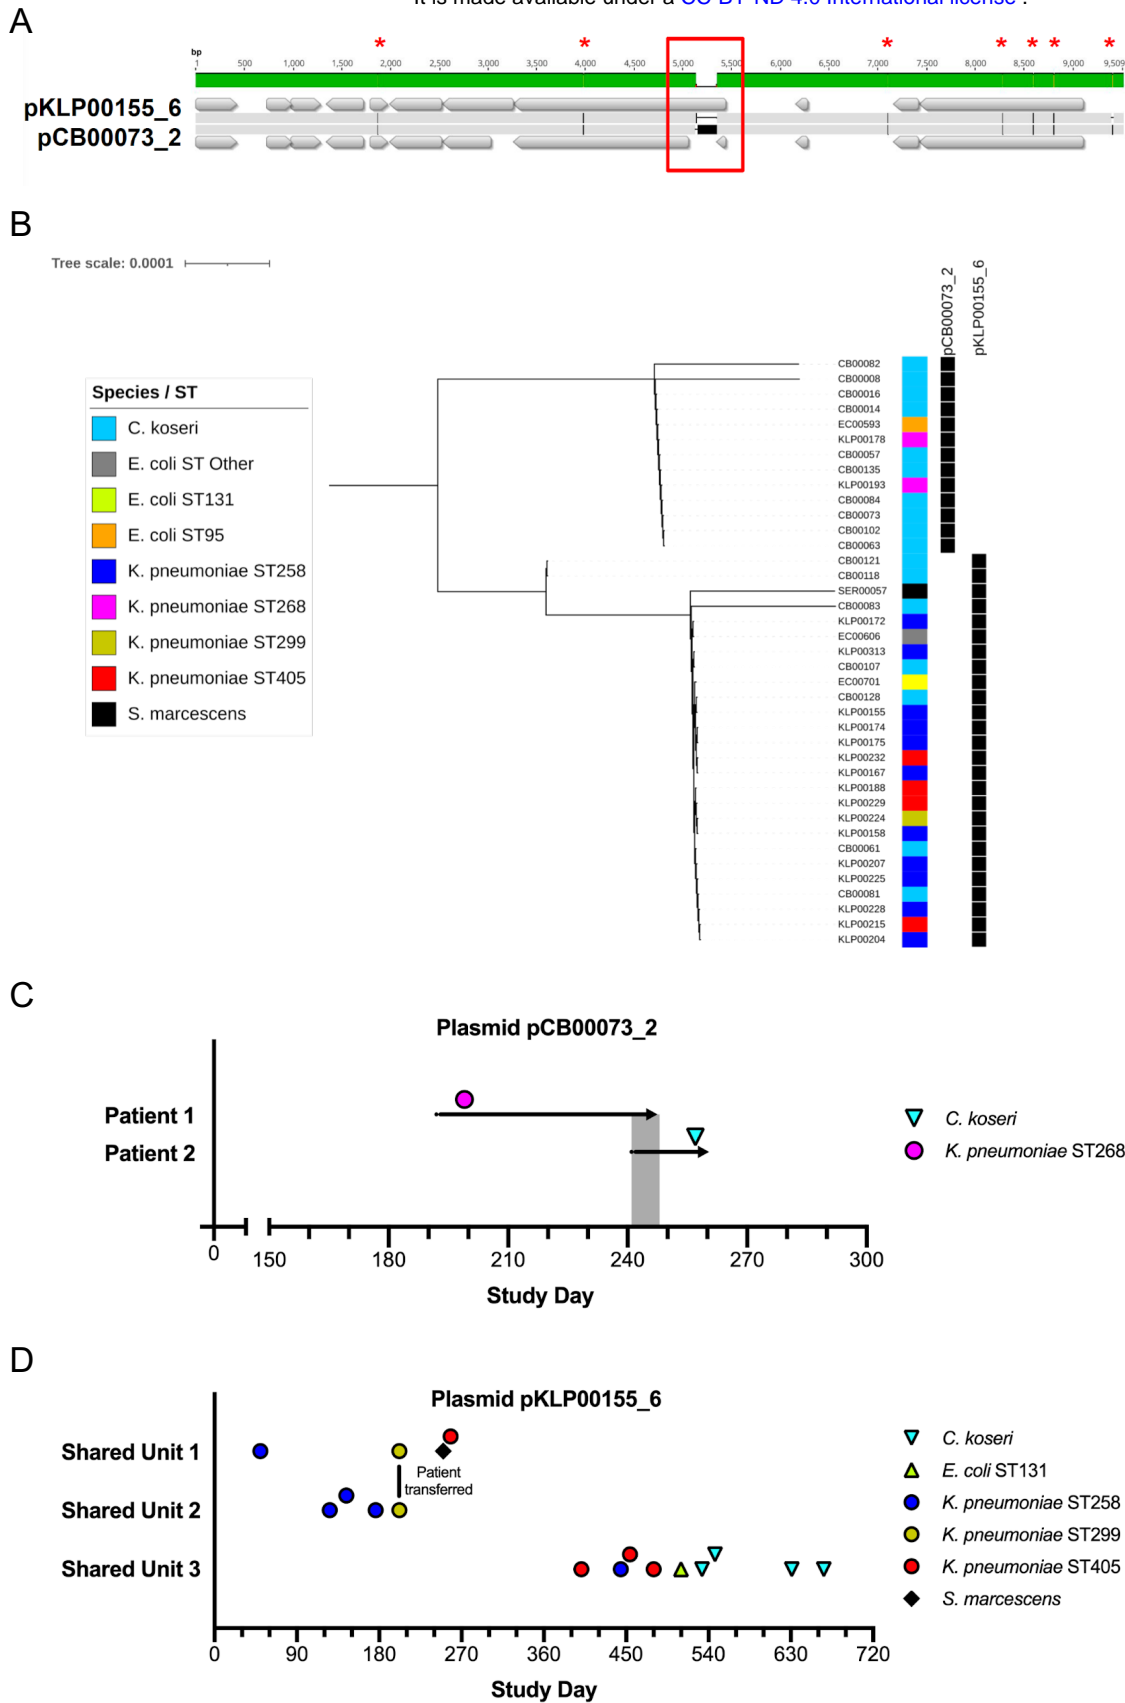

**Figure 3: Resolution of two closely related colicin-encoding plasmid variants**

(A) Nucleotide sequence alignment with point mutations highlighted by red asterisks and an insertion sequence marked by a red box. (B) Bootstrapped RAxML phylogeny of core plasmid sequences, using the pCB00073\_2 sequence as an internal reference. (C) Timeline of dates of culture (de-identified as study days) and inpatient stays (gray shading) of two patients on the same unit infected with bacterial isolates of different species carrying pCB00073\_2. (D) Timeline of culture dates of three groups of patients on three different shared units whose nosocomial isolates all carried pKLP00155\_6.

A

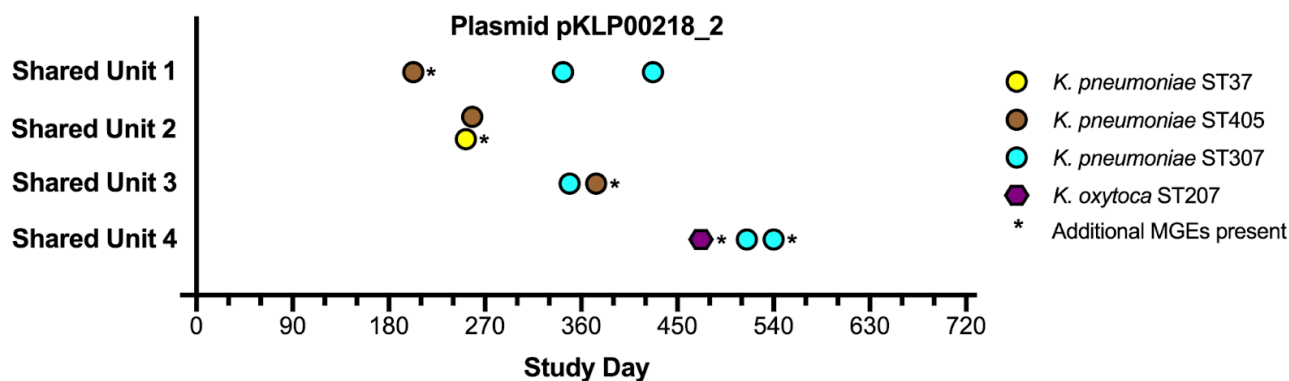

B

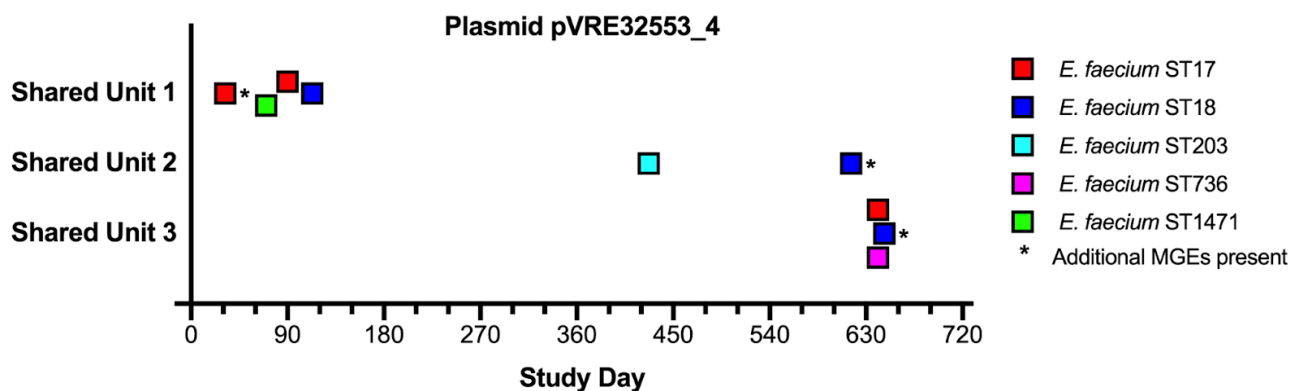

**Figure 4: Geographically associated patients infected by bacteria carrying plasmid backbones engaged in horizontal transfer**  
Plots show associations of patients infected by (A) multiple STs and species of *Klebsiella* spp. carrying plasmid pKLP00218\_2, and (B) multiple STs of *E. faecium* carrying pVRE32553\_4. Study days correspond to dates of culture of plasmid-carrying pathogens. Shapes and colors of data points correspond to bacterial species and ST, respectively. See Supplementary Figure 2 for plasmid alignments depicting additional mobile genetic element (MGE) sequences.

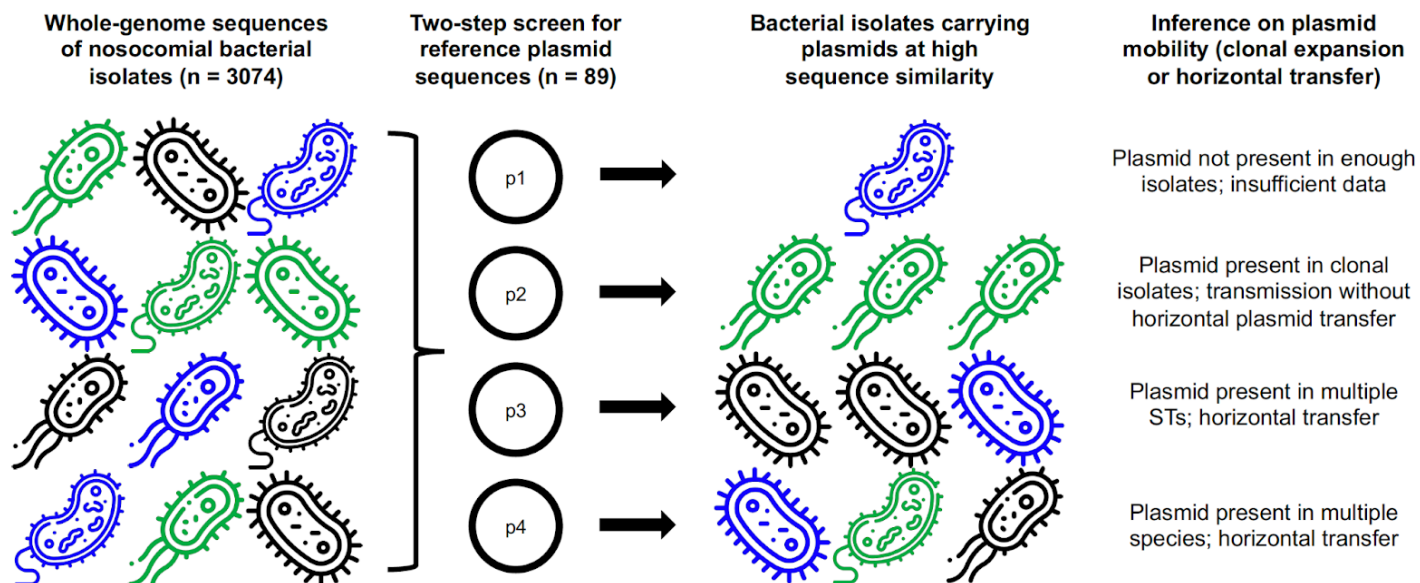

**Supplementary Figure 1: Conceptual flow diagram of alignment-based pipeline to infer horizontal plasmid transfer**

Different bacterial icons denote different species, and different colors denote different sequence types (STs). Figure constructed with icons made by Freepik from Flaticon.com.

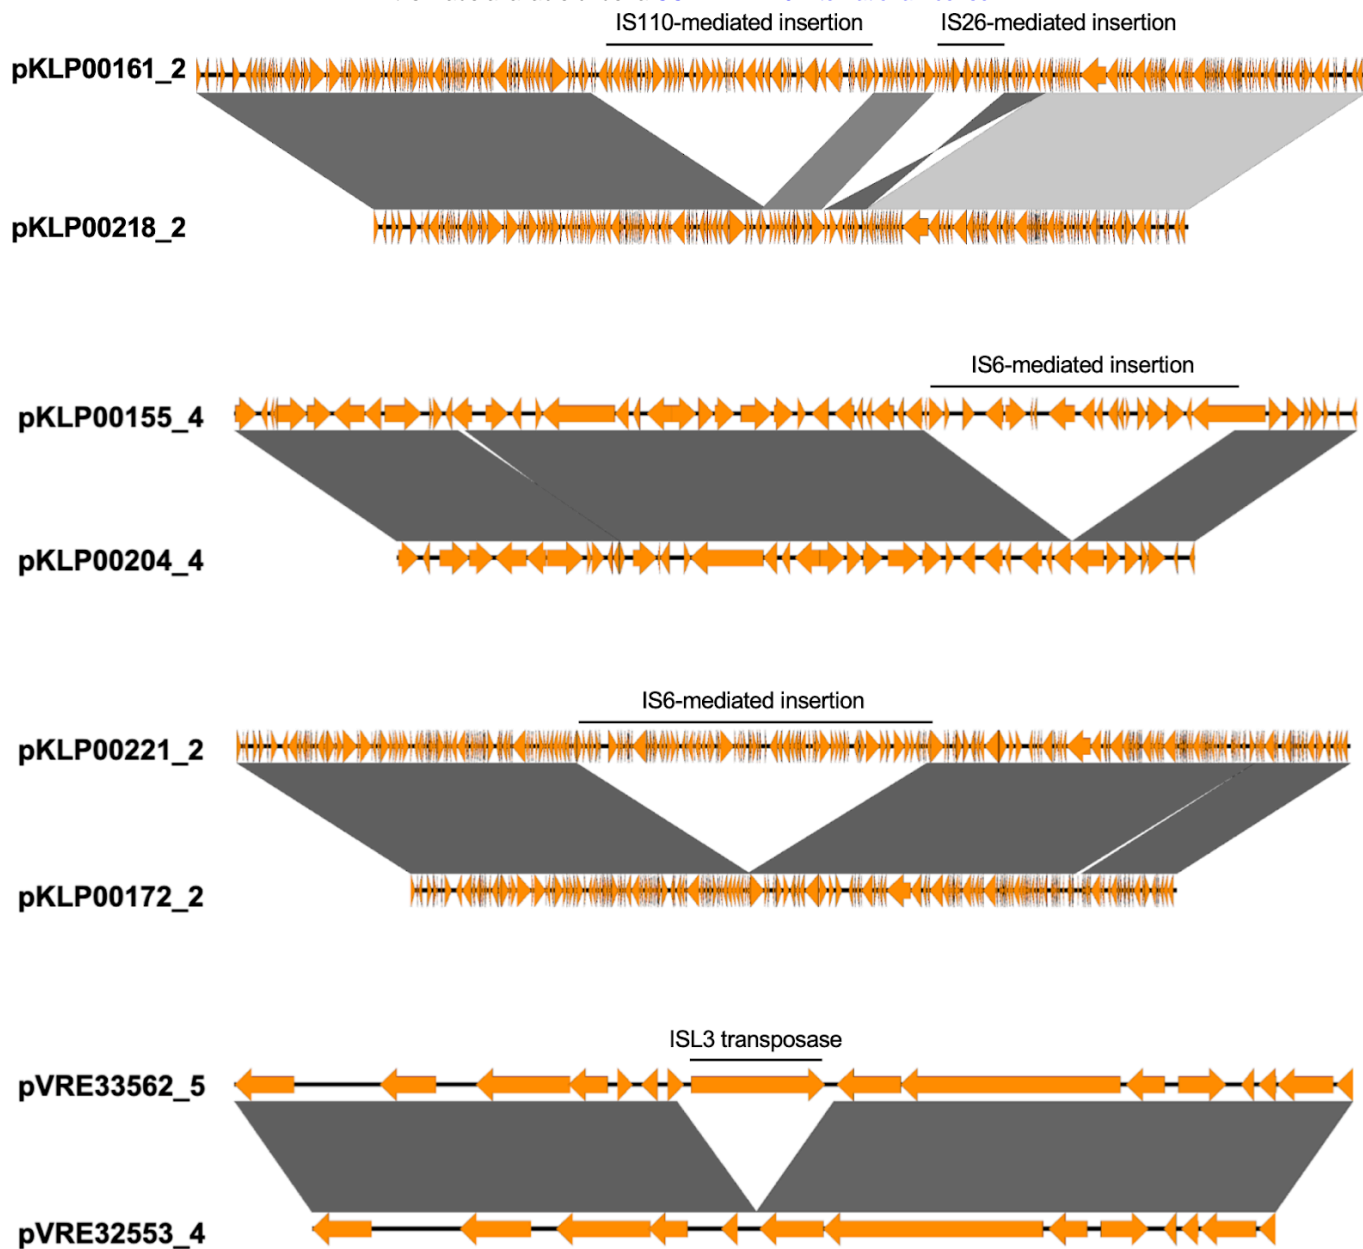

**Supplementary Figure 2: Alignments of four pairs of plasmids with shared backbone sequences that met sequence identity and coverage thresholds**

Grey shading indicates a BLASTn alignment of at least 2,000bp with an e-value of 0 at nucleotide sequence identities of at least 99.9%. Darker shading indicates higher nucleotide sequence identity.

Tree scale: 0.00001

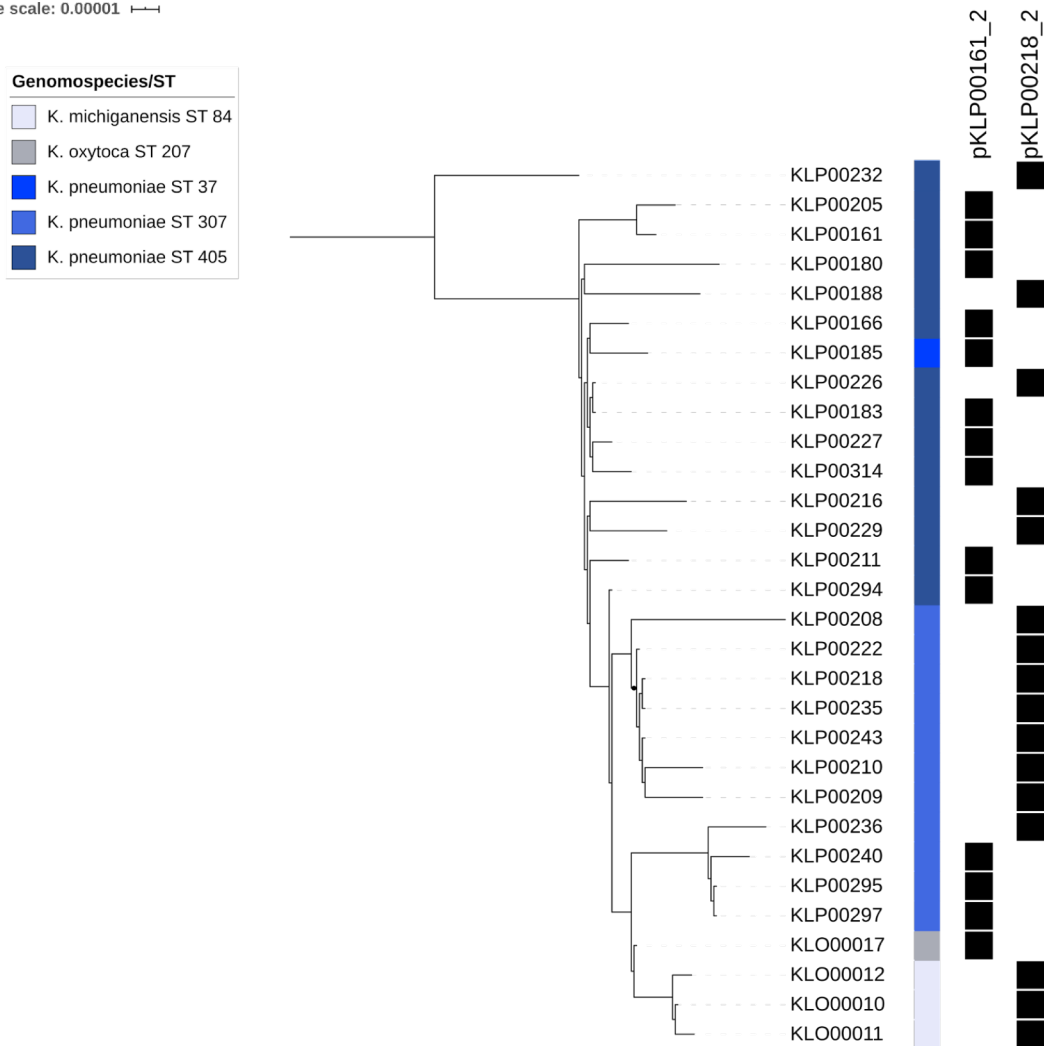

**Supplementary Figure 3: Two recombining variants of *Klebsiella* spp. plasmids**

Bootstrapped RAxML phylogeny of core plasmid sequences conserved among isolates carrying either variant, using the pKLP00218\_2 sequence as a reference.
